# Supplementary material for: Reliability analysis for a data flow in event-driven wireless sensor networks using a multiple sending transmission approach
Source: Springer Nature journal article supplement (doi:10.1186/1687-1499-2013-277), 2013-12-01

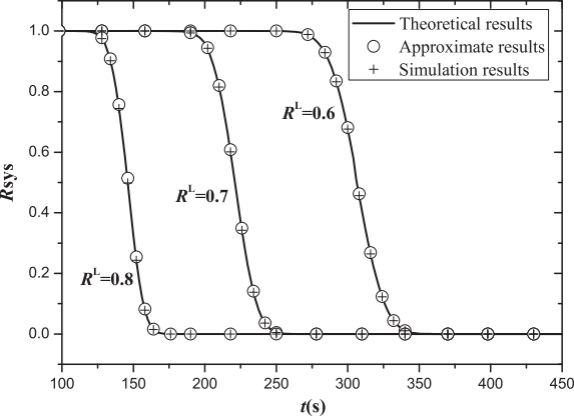

Supplement: 13638_2013_839_MOESM4_ESM.pdf [file 13638_2013_839_MOESM4_ESM.pdf]
